# Supplementary material for: Modification of the Integrated Sasang Constitutional Diagnostic Model
Source: Hindawi journal article supplement (doi:10.1155/2017/9180159), 2017-01-01

**Table S1. List of Questions**

| Personality Questionnaire                                                                                                                                                                                                                                                                              |              |   |   |   |             |
|--------------------------------------------------------------------------------------------------------------------------------------------------------------------------------------------------------------------------------------------------------------------------------------------------------|--------------|---|---|---|-------------|
| This survey asks for your views about your personality. This information will be help keep track of your constitution. Answer every question by marking (✓) the answer as indicated. If you are unsure about how to answer a question, please give the best answer you can. ② means the middle status. |              |   |   |   |             |
| 1. Are you broad-minded or delicate?                                                                                                                                                                                                                                                                   | broad-minded | ① | ② | ③ | delicate    |
| 2. Do you tend to act quickly or slowly?                                                                                                                                                                                                                                                               | quickly      | ① | ② | ③ | slowly      |
| 3. Do you tend be active or passive?                                                                                                                                                                                                                                                                   | active       | ① | ② | ③ | passive     |
| 4. When expressing your opinion, do you tend to do it straightly or indirectly?                                                                                                                                                                                                                        | directly     | ① | ② | ③ | indirectly  |
| 5. Do you tend to be extrovert or introvert?                                                                                                                                                                                                                                                           | extrovert    | ① | ② | ③ | introvert   |
| 6. Do you tend to be energetic or quiet?                                                                                                                                                                                                                                                               | energetic    | ① | ② | ③ | quiet       |
| 7. Is it easy or hard for you to make quick decisions?                                                                                                                                                                                                                                                 | easy         | ① | ② | ③ | hard        |
| 8. Do you tend to be masculine or feminine?                                                                                                                                                                                                                                                            | masculine    | ① | ② | ③ | feminine    |
| 9. Do you tend to discuss or hide your private life from others?                                                                                                                                                                                                                                       | open         | ① | ② | ③ | hide        |
| 10. Do you tend to express your opinions or keep them inside?                                                                                                                                                                                                                                          | express      | ① | ② | ③ | keep inside |
| 11. Do you tend to be excited or rational when you deal something?                                                                                                                                                                                                                                     | excited      | ① | ② | ③ | rational    |
| 12. Do you tend to act hastily or carefully?                                                                                                                                                                                                                                                           | hastily      | ① | ② | ③ | carefully   |

  

| Questionnaire on Habits                                                                                                                                                                           |                                                                                                                                                                                                 |
|---------------------------------------------------------------------------------------------------------------------------------------------------------------------------------------------------|-------------------------------------------------------------------------------------------------------------------------------------------------------------------------------------------------|
| Please check your habits within 6 months based on your usual life style. You can ask the person in charge when the question is ambiguous. You can check more than twice for the questions with *. |                                                                                                                                                                                                 |
| Meal                                                                                                                                                                                              | 13. How much do you eat daily?<br><input type="checkbox"/> much <input type="checkbox"/> medium <input type="checkbox"/> a little <input type="checkbox"/> irregular                            |
|                                                                                                                                                                                                   | 14. How fast do you eat?<br><input type="checkbox"/> fast <input type="checkbox"/> medium <input type="checkbox"/> slowly                                                                       |
| Digestion                                                                                                                                                                                         | 15. Do you digest well?<br><input type="checkbox"/> yes <input type="checkbox"/> no<br>if No --> Does digestive dysfunction upset you? <input type="checkbox"/> yes <input type="checkbox"/> no |
|                                                                                                                                                                                                   | 16. How is your appetite?<br><input type="checkbox"/> Extremely good <input type="checkbox"/> good <input type="checkbox"/> medium <input type="checkbox"/> not good                            |
|                                                                                                                                                                                                   | Do you suffer from these signs?                                                                                                                                                                 |

| Questionnaire on Habits |                                                                                                                                                                                                                                                                         |                                                                                                                                                    |                                                                                                                                                    |                                                                                                                                                                        |                                                                                                                                            |                                                                                                                                    |                                                                                                                                                       |
|-------------------------|-------------------------------------------------------------------------------------------------------------------------------------------------------------------------------------------------------------------------------------------------------------------------|----------------------------------------------------------------------------------------------------------------------------------------------------|----------------------------------------------------------------------------------------------------------------------------------------------------|------------------------------------------------------------------------------------------------------------------------------------------------------------------------|--------------------------------------------------------------------------------------------------------------------------------------------|------------------------------------------------------------------------------------------------------------------------------------|-------------------------------------------------------------------------------------------------------------------------------------------------------|
|                         | Signs                                                                                                                                                                                                                                                                   | Regularly                                                                                                                                          | Some time                                                                                                                                          | Never                                                                                                                                                                  |                                                                                                                                            |                                                                                                                                    |                                                                                                                                                       |
|                         | 17. Epigastric discomfort                                                                                                                                                                                                                                               | <input type="checkbox"/>                                                                                                                           | <input type="checkbox"/>                                                                                                                           | <input type="checkbox"/>                                                                                                                                               |                                                                                                                                            |                                                                                                                                    |                                                                                                                                                       |
|                         | 18. Vomiting                                                                                                                                                                                                                                                            | <input type="checkbox"/>                                                                                                                           | <input type="checkbox"/>                                                                                                                           | <input type="checkbox"/>                                                                                                                                               |                                                                                                                                            |                                                                                                                                    |                                                                                                                                                       |
|                         | 19. Indigestion                                                                                                                                                                                                                                                         | <input type="checkbox"/>                                                                                                                           | <input type="checkbox"/>                                                                                                                           | <input type="checkbox"/>                                                                                                                                               |                                                                                                                                            |                                                                                                                                    |                                                                                                                                                       |
| Perspiration            | 20. Generally, how much do you perspire?                                                                                                                                                                                                                                | <input type="checkbox"/> a lot                                                                                                                     | <input type="checkbox"/> moderate                                                                                                                  | <input type="checkbox"/> little <input type="checkbox"/> Never                                                                                                         |                                                                                                                                            |                                                                                                                                    |                                                                                                                                                       |
|                         | 21. In hot weather, how much do you perspire?                                                                                                                                                                                                                           | <input type="checkbox"/> a lot                                                                                                                     | <input type="checkbox"/> moderate                                                                                                                  | <input type="checkbox"/> little <input type="checkbox"/> Never                                                                                                         |                                                                                                                                            |                                                                                                                                    |                                                                                                                                                       |
|                         | 22. How do you feel after perspiration?                                                                                                                                                                                                                                 | <input type="checkbox"/> refreshed                                                                                                                 | <input type="checkbox"/> tired                                                                                                                     | <input type="checkbox"/> no feeling                                                                                                                                    |                                                                                                                                            |                                                                                                                                    |                                                                                                                                                       |
|                         | 23. Do you have cold sweat or perspire in below situations? (You can check several times)                                                                                                                                                                               | <input type="checkbox"/> never                                                                                                                     | <input type="checkbox"/> sweat at night                                                                                                            | <input type="checkbox"/> sweat during day                                                                                                                              | <input type="checkbox"/> sweat during meals                                                                                                |                                                                                                                                    |                                                                                                                                                       |
| Defecation              | 24. How about the condition of your stool?<br><input type="checkbox"/> Diarrhea <input type="checkbox"/> Constipation <input type="checkbox"/> Diarrhea and constipation alternatively<br><input type="checkbox"/> like indigested food <input type="checkbox"/> Normal |                                                                                                                                                    |                                                                                                                                                    |                                                                                                                                                                        |                                                                                                                                            |                                                                                                                                    |                                                                                                                                                       |
|                         | 25. What is the shape of your stool? Chose the most appropriate shape.                                                                                                                                                                                                  | <input type="checkbox"/><br><br>Hard, dry, round, and small shape | <input type="checkbox"/><br><br>Hard, compact, and sausage-shaped | <input type="checkbox"/><br><br>Sausage-shaped with surface cracks across the surface | <input type="checkbox"/><br><br>Soft and ice-cream shaped | <input type="checkbox"/><br><br>Soft with chunks | <input type="checkbox"/><br><br>Porridge consistency and scattered |
| Sleep                   | 26. Your real sleeping time per day is <input type="text"/> hours and <input type="text"/> minutes<br>(real sleeping time refers to the sleeping duration not the duration staying in bed)                                                                              |                                                                                                                                                    |                                                                                                                                                    |                                                                                                                                                                        |                                                                                                                                            |                                                                                                                                    |                                                                                                                                                       |
| Heat and cold           | 27. In general, do you dislike cold or heat?                                                                                                                                                                                                                            | <input type="checkbox"/> cold                                                                                                                      | <input type="checkbox"/> heat                                                                                                                      | <input type="checkbox"/> both <input type="checkbox"/> both are ok                                                                                                     |                                                                                                                                            |                                                                                                                                    |                                                                                                                                                       |
|                         | 28. Your hands always are                                                                                                                                                                                                                                               | <input type="checkbox"/> warm                                                                                                                      | <input type="checkbox"/> medium                                                                                                                    | <input type="checkbox"/> cold <input type="checkbox"/> not sure                                                                                                        |                                                                                                                                            |                                                                                                                                    |                                                                                                                                                       |
|                         | 29. Your feet always are                                                                                                                                                                                                                                                | <input type="checkbox"/> warm                                                                                                                      | <input type="checkbox"/> medium                                                                                                                    | <input type="checkbox"/> cold <input type="checkbox"/> not sure                                                                                                        |                                                                                                                                            |                                                                                                                                    |                                                                                                                                                       |
|                         | 30. Your abdomen always are                                                                                                                                                                                                                                             | <input type="checkbox"/> warm                                                                                                                      | <input type="checkbox"/> medium                                                                                                                    | <input type="checkbox"/> cold <input type="checkbox"/> not sure                                                                                                        |                                                                                                                                            |                                                                                                                                    |                                                                                                                                                       |
| Drinking water          | 31. How much water do you drink a day?<br><input type="checkbox"/> a lot <input type="checkbox"/> medium <input type="checkbox"/> a little <input type="checkbox"/> frequently with small amount                                                                        |                                                                                                                                                    |                                                                                                                                                    |                                                                                                                                                                        |                                                                                                                                            |                                                                                                                                    |                                                                                                                                                       |
|                         | 32. How is the temperature of the water you drink?<br><input type="checkbox"/> usually hot water <input type="checkbox"/> usually cold water <input type="checkbox"/> not specific                                                                                      |                                                                                                                                                    |                                                                                                                                                    |                                                                                                                                                                        |                                                                                                                                            |                                                                                                                                    |                                                                                                                                                       |
| Catching common cold    | 33. If you catch a cold, which of the following symptoms do you have?<br>(You can check several times)                                                                                                                                                                  |                                                                                                                                                    |                                                                                                                                                    |                                                                                                                                                                        |                                                                                                                                            |                                                                                                                                    |                                                                                                                                                       |
|                         | <input type="checkbox"/> no symptoms                                                                                                                                                                                                                                    | <input type="checkbox"/> fever                                                                                                                     | <input type="checkbox"/> headache                                                                                                                  | <input type="checkbox"/> dizzy                                                                                                                                         |                                                                                                                                            |                                                                                                                                    |                                                                                                                                                       |
|                         | <input type="checkbox"/> runny or stuffy nose                                                                                                                                                                                                                           |                                                                                                                                                    |                                                                                                                                                    |                                                                                                                                                                        |                                                                                                                                            |                                                                                                                                    |                                                                                                                                                       |
|                         | <input type="checkbox"/> loss of hearing                                                                                                                                                                                                                                | <input type="checkbox"/> cough(phlegm)                                                                                                             | <input type="checkbox"/> sore throat                                                                                                               | <input type="checkbox"/> body pain                                                                                                                                     |                                                                                                                                            |                                                                                                                                    |                                                                                                                                                       |

### Questionnaire on Habits

|                  |                                                                                                                                                                                                                                                                                                                                                                                                                                                                                                                                                                                                                                                                                                                                                                                                                    |
|------------------|--------------------------------------------------------------------------------------------------------------------------------------------------------------------------------------------------------------------------------------------------------------------------------------------------------------------------------------------------------------------------------------------------------------------------------------------------------------------------------------------------------------------------------------------------------------------------------------------------------------------------------------------------------------------------------------------------------------------------------------------------------------------------------------------------------------------|
|                  | <input type="checkbox"/> <sub>10</sub> numbness in my arms and legs <input type="checkbox"/> <sub>11</sub> loss of appetite and/or indigestion                                                                                                                                                                                                                                                                                                                                                                                                                                                                                                                                                                                                                                                                     |
| <b>Condition</b> | 34. Which of the following do you experience when not feeling healthy?<br>(You can check several times)<br><input type="checkbox"/> <sub>1</sub> sweating <input type="checkbox"/> <sub>2</sub> indigestion <input type="checkbox"/> <sub>3</sub> bowel issues <input type="checkbox"/> <sub>4</sub> urinary issues<br><input type="checkbox"/> <sub>5</sub> not specific                                                                                                                                                                                                                                                                                                                                                                                                                                          |
| <b>Other</b>     | 35. Do you experience any of the symptoms below?<br>(You can check several times)<br><input type="checkbox"/> <sub>1</sub> lateral sides of the head discomfort <input type="checkbox"/> <sub>2</sub> feverish headache<br><input type="checkbox"/> <sub>3</sub> discomfort at the head with empty feeling<br><input type="checkbox"/> <sub>4</sub> loss of memory <input type="checkbox"/> <sub>5</sub> mouth frequently blistered <input type="checkbox"/> <sub>6</sub> eye pain <input type="checkbox"/> <sub>7</sub> swelling<br><input type="checkbox"/> <sub>8</sub> palpitation<br><input type="checkbox"/> <sub>9</sub> shortness of breath <input type="checkbox"/> <sub>10</sub> frequent sigh <input type="checkbox"/> <sub>11</sub> dizziness <input type="checkbox"/> <sub>12</sub> none of the above |

**Table S2. Result of estimated coefficients for Facial features for each SC type using LASSO**

| Features                         | Male                             |                                  |                                  | Female                           |                                  |                                  |
|----------------------------------|----------------------------------|----------------------------------|----------------------------------|----------------------------------|----------------------------------|----------------------------------|
|                                  | $\hat{\beta}_{1,lasso}(\lambda)$ | $\hat{\beta}_{2,lasso}(\lambda)$ | $\hat{\beta}_{3,lasso}(\lambda)$ | $\hat{\beta}_{1,lasso}(\lambda)$ | $\hat{\beta}_{2,lasso}(\lambda)$ | $\hat{\beta}_{3,lasso}(\lambda)$ |
| $\hat{\beta}_{0,lasso}(\lambda)$ | -0.03                            | 0.01                             | 0.02                             | -0.21                            | -0.06                            | 0.27                             |
| AGE                              |                                  | 0.00                             | 0.00                             | 0.00                             |                                  | 0.00                             |
| FDV_47_52                        |                                  |                                  |                                  |                                  |                                  |                                  |
| FDV_47_50                        |                                  |                                  |                                  |                                  |                                  |                                  |
| FDV_10_21                        |                                  | 0.03                             | -0.06                            | -0.08                            | 0.01                             |                                  |
| FDV_52_50                        |                                  | -0.03                            |                                  |                                  |                                  |                                  |
| FDV_52_81                        |                                  |                                  |                                  | 0.36                             |                                  |                                  |
| FDV_81_50                        |                                  |                                  |                                  |                                  |                                  |                                  |
| FD_43_143_aD                     | 0.07                             |                                  |                                  |                                  | -0.24                            |                                  |
| FD_53_153_aD                     |                                  |                                  |                                  |                                  | -0.13                            |                                  |
| FD_94_194_aD                     |                                  | -0.01                            |                                  |                                  |                                  |                                  |
| FDH_33_133_aD                    |                                  |                                  |                                  |                                  | -0.18                            |                                  |
| FHD_33_133_43_143                |                                  | 0.01                             | -0.41                            |                                  |                                  |                                  |
| FDD_53_153_43_143                |                                  |                                  |                                  |                                  |                                  |                                  |
| FDD_94_194_43_143                |                                  |                                  |                                  |                                  |                                  |                                  |
| FHD_33_133_53_153                |                                  |                                  | -0.01                            | -0.29                            |                                  |                                  |
| FDD_94_194_53_153                |                                  |                                  |                                  |                                  |                                  |                                  |
| FVV_47_52_52_81                  |                                  |                                  |                                  |                                  | 0.25                             |                                  |
| FVV_47_52_52_50                  |                                  |                                  |                                  |                                  |                                  |                                  |
| FVV_47_52_81_50                  | -0.14                            | 0.23                             |                                  |                                  |                                  |                                  |
| FVV_52_81_81_50                  |                                  |                                  |                                  |                                  |                                  |                                  |
| FVD_52_50_53_153_aD              |                                  |                                  |                                  |                                  | 0.07                             |                                  |
| FVD_52_81_53_153_aD              | -0.55                            |                                  |                                  |                                  |                                  | 0.00                             |
| FVD_81_50_94_194_aD              |                                  |                                  |                                  | -0.42                            | 0.15                             |                                  |
| FA_53_94                         |                                  |                                  |                                  | 0.12                             | -0.01                            |                                  |
| FAs_153_194                      | 0.16                             |                                  | -0.39                            | 0.26                             | -0.25                            |                                  |
| FA_94_43                         |                                  |                                  |                                  | 0.05                             |                                  |                                  |
| FAs_194_143                      | -0.02                            | 0.00                             |                                  | 0.03                             |                                  |                                  |
| FA_53_94_43                      |                                  | 0.16                             |                                  |                                  |                                  |                                  |
| FA_18_25_43                      |                                  |                                  | -0.16                            |                                  |                                  |                                  |
| FA_118_125_143                   | 0.10                             | -0.23                            |                                  |                                  | 0.19                             |                                  |
| FA_18_17_43                      | 0.04                             |                                  |                                  |                                  |                                  |                                  |

|                          |       |       |       |       |       |
|--------------------------|-------|-------|-------|-------|-------|
| FA_118_117_143           | 0.18  | -0.30 |       |       |       |
| FA_17_25_43              |       |       |       |       | -0.13 |
| FA_117_125_143           |       |       |       | -0.03 |       |
| FA_18_25_94              |       |       |       | 0.13  |       |
| FA_18_43_50              | -0.15 |       |       |       | 0.01  |
| FA_18_94_50              |       | 0.09  |       |       |       |
| FArea02_aD               | 0.39  |       |       |       |       |
| FArea03_aD               |       |       |       |       | 0.01  |
| FArea02_03               | 0.06  |       |       | -0.29 | 0.18  |
| FDV_47_10                |       |       |       | 0.03  | -0.07 |
| FDH_18_25                |       |       |       |       |       |
| FDH_118_125              |       |       |       |       | -0.05 |
| FDH_18_118               |       |       |       |       |       |
| FDH_25_125               |       |       |       |       | -0.18 |
| FDH_21_121               |       | -0.23 |       |       |       |
| FD_17_26                 |       |       |       |       | -0.14 |
| FD_117_126               | 0.19  | -0.11 |       |       |       |
| FD_17_25                 |       | -0.30 | 0.04  |       |       |
| FD_117_125               |       |       | -0.14 | 0.19  |       |
| FD_18_25                 |       |       |       |       |       |
| FD_118_125               |       |       |       | 0.10  |       |
| FDH_17_26_18_25          |       |       |       |       |       |
| FDH_117_126_118_125      |       |       |       |       | 0.09  |
| FDH_52_50_18_118         |       |       |       |       | -0.15 |
| FRE_H01                  |       |       | 0.18  |       | 0.04  |
| FRE_H02_aD               |       |       |       |       | -0.08 |
| FRE_H05_aD               |       |       |       |       |       |
| FHD_18_118_53_153_a<br>D |       | 0.11  |       |       |       |
| FHD_25_125_53_153_a<br>D |       |       |       | -0.05 | 0.02  |
| FDD_17_26_52_81          |       | 0.20  |       |       |       |
| FDD_17_26_52_50          |       | 0.00  |       |       | 0.10  |
| FA_18_17_25              |       |       | -0.06 |       | -0.28 |
| FA_118_117_125           |       |       |       | 0.04  | -0.14 |
| FAi_25_17                | -0.12 |       |       |       | 0.02  |

|                          |       |       |       |       |       |
|--------------------------|-------|-------|-------|-------|-------|
| FAis_125_117             | -0.05 | 0.01  |       | -0.03 | 0.05  |
| FAis_18_17               |       | -0.30 | 0.02  |       | -0.09 |
| FAi_118_117              |       |       |       |       |       |
| FAis_18_25               |       |       |       |       |       |
| FAi_118_125              |       | -0.20 |       |       |       |
| FDH_36_136               |       |       |       |       |       |
| FHD_36_136_53_153_a<br>D | 0.00  |       |       | 0.00  | 0.09  |
| FVH_52_81_36_136         | 0.20  |       |       |       |       |
| FArea_52_36_136          |       |       | -0.04 |       | 0.00  |
| FDV_80_50                | 0.15  |       |       | 0.22  | -0.01 |
| FVV_80_50_52_50          |       |       |       |       |       |
| FVV_80_50_81_50          | -0.18 | 0.23  |       |       | -0.06 |
| PD_7_77                  | 0.03  |       |       |       | -0.04 |
| PDV_7_9                  |       | -0.13 | 0.10  |       | -0.02 |
| PAi_9_7                  | 0.02  |       | -0.04 |       | 0.00  |
| PAi_71_72                |       |       |       | 0.01  | -0.04 |
| PAi_72_73                | 0.00  | 0.22  |       | -0.04 | 0.01  |
| PDV_9_12                 | 0.31  | -0.16 |       | 0.25  | -0.05 |
| PDH_9_12                 |       |       |       |       | -0.28 |
| PA_9_12                  |       |       | -0.18 |       | -0.19 |
| PA_10_12                 | -0.32 |       | 0.10  | -0.15 | 0.16  |
| PDH_12_14                |       |       | -0.26 | 0.05  | -0.21 |
| PDH_14_21                |       |       |       |       | -0.15 |
| PDL_14_12_21             |       |       |       |       |       |
| PDV_12_14                |       |       |       |       | 0.02  |
| PDV_14_21                |       | -0.07 |       |       |       |
| PDV_12_21                |       | -0.26 |       |       | 0.05  |
| PD_12_21                 |       |       |       |       |       |
| PArea_12_14_21           |       |       | -0.06 |       |       |
| PAi_14_12                |       | -0.01 |       |       |       |
| PA_14_21                 |       |       |       |       |       |
| PA_12_14_21              |       | -0.04 | 0.03  |       |       |
| PAi_13_84                | 0.06  | 0.00  |       | 0.05  |       |
| PA_87_21                 |       | 0.00  | -0.21 |       | 0.02  |

---

$\hat{\beta}_{1,lasso}(\hat{\lambda}), \hat{\beta}_{2,lasso}(\hat{\lambda}), \hat{\beta}_{3,lasso}(\hat{\lambda})$  represent result of estimated coefficients via LASSO for each SC group, TE, SE, and SY, respectively, where  $\hat{\lambda} = e^{\log(\hat{\lambda})}$ , chosen from the result of ten-fold cross validation.

**Table S3. Result of estimated coefficients for Voice features for each SC type using LASSO**

| Features                               | Male                                   |                                        |                                        | Female                                 |                                        |                                        |
|----------------------------------------|----------------------------------------|----------------------------------------|----------------------------------------|----------------------------------------|----------------------------------------|----------------------------------------|
|                                        | $\hat{\beta}_{1,lasso}(\hat{\lambda})$ | $\hat{\beta}_{2,lasso}(\hat{\lambda})$ | $\hat{\beta}_{3,lasso}(\hat{\lambda})$ | $\hat{\beta}_{1,lasso}(\hat{\lambda})$ | $\hat{\beta}_{2,lasso}(\hat{\lambda})$ | $\hat{\beta}_{3,lasso}(\hat{\lambda})$ |
| $\hat{\beta}_{0,lasso}(\hat{\lambda})$ | 0.10                                   | 0.02                                   | -0.12                                  | -0.47                                  | 0.25                                   | 0.22                                   |
| AGE                                    |                                        | 0.00                                   | 0.00                                   | 0.02                                   |                                        | 0.00                                   |
| sF10                                   | 0.11                                   | -0.38                                  |                                        | 0.17                                   |                                        | -0.15                                  |
| sF50                                   | -0.46                                  | 0.04                                   |                                        |                                        | 0.19                                   | -0.42                                  |
| sF90                                   |                                        |                                        | 0.23                                   |                                        | 0.40                                   | -0.44                                  |
| sFHL                                   | -0.20                                  | 0.20                                   |                                        |                                        | -0.06                                  | 0.08                                   |
| sF0                                    | 0.17                                   |                                        | -0.37                                  |                                        | -0.26                                  | 0.95                                   |
| sFCV                                   |                                        | -0.22                                  | 0.00                                   |                                        | -0.13                                  | 0.12                                   |
| sDT                                    |                                        | -0.01                                  | 0.06                                   | 0.02                                   | -0.02                                  |                                        |
| sMFCC1                                 | 0.11                                   |                                        | -0.25                                  | 0.04                                   | 0.00                                   |                                        |
| sMFCC2                                 |                                        | -0.16                                  | 0.15                                   |                                        | 0.21                                   | -0.08                                  |
| sMFCC3                                 |                                        | 0.01                                   | -0.18                                  | -0.15                                  | 0.10                                   |                                        |
| sMFCC4                                 |                                        | -0.03                                  | 0.07                                   | 0.02                                   | -0.09                                  |                                        |
| sMFCC5                                 | -0.06                                  | 0.17                                   |                                        | 0.05                                   | -0.08                                  |                                        |
| sMFCC6                                 |                                        | 0.25                                   | -0.12                                  |                                        | -0.03                                  | 0.09                                   |
| sMFCC7                                 |                                        | 0.24                                   | -0.23                                  | -0.05                                  | 0.19                                   |                                        |
| sMFCC8                                 | 0.12                                   |                                        | -0.20                                  | 0.18                                   |                                        | -0.20                                  |
| sMFCC9                                 | 0.21                                   | -0.16                                  |                                        | 0.22                                   | -0.08                                  |                                        |
| sMFCC10                                |                                        | -0.20                                  | 0.13                                   | 0.02                                   |                                        | -0.01                                  |
| sMFCC11                                | 0.01                                   | -0.18                                  |                                        | -0.12                                  | 0.04                                   |                                        |
| sMFCC12                                |                                        | -0.11                                  |                                        | -0.13                                  |                                        | 0.11                                   |
| sHNR35                                 |                                        | 0.01                                   | -0.18                                  |                                        | -0.02                                  | 0.10                                   |
| sCPP                                   | 0.00                                   |                                        | 0.08                                   |                                        | 0.01                                   | -0.06                                  |

$\hat{\beta}_{1,lasso}(\hat{\lambda}), \hat{\beta}_{2,lasso}(\hat{\lambda}), \hat{\beta}_{3,lasso}(\hat{\lambda})$  represent result of estimated coefficients via LASSO for each SC group, TE, SE, and SY, respectively, where  $\hat{\lambda} = e^{\log(\hat{\lambda})}$ , chosen from the result of ten-fold cross validation.

**Table S4. Result of estimated coefficients for Body shape features for each SC type using LASSO**

| Features                               | Male                                   |                                        |                                        | Female                                 |                                        |                                        |
|----------------------------------------|----------------------------------------|----------------------------------------|----------------------------------------|----------------------------------------|----------------------------------------|----------------------------------------|
|                                        | $\hat{\beta}_{1,lasso}(\hat{\lambda})$ | $\hat{\beta}_{2,lasso}(\hat{\lambda})$ | $\hat{\beta}_{3,lasso}(\hat{\lambda})$ | $\hat{\beta}_{1,lasso}(\hat{\lambda})$ | $\hat{\beta}_{2,lasso}(\hat{\lambda})$ | $\hat{\beta}_{3,lasso}(\hat{\lambda})$ |
| $\hat{\beta}_{0,lasso}(\hat{\lambda})$ | 0.02                                   | 0.17                                   | -0.19                                  | -0.26                                  | -0.08                                  | 0.34                                   |
| AGE                                    |                                        | -0.01                                  | 0.01                                   | 0.01                                   | 0.00                                   |                                        |
| HEIGHT                                 | -0.14                                  | 0.06                                   |                                        |                                        | 0.18                                   | -0.09                                  |
| WEIGHT                                 |                                        |                                        |                                        |                                        |                                        |                                        |
| BMI                                    |                                        |                                        |                                        |                                        |                                        |                                        |
| FC                                     | 1.12                                   |                                        | -0.47                                  | -0.10                                  |                                        | 0.29                                   |
| NC                                     | -0.52                                  |                                        | 0.82                                   | 0.56                                   | -1.41                                  |                                        |
| AC                                     |                                        |                                        |                                        | 0.51                                   |                                        | -2.77                                  |
| CC                                     |                                        |                                        |                                        | -0.28                                  |                                        | 1.84                                   |
| RC                                     |                                        |                                        |                                        |                                        |                                        |                                        |
| WC                                     |                                        |                                        |                                        | 0.00                                   |                                        | -0.07                                  |
| HC                                     |                                        | -0.56                                  |                                        |                                        |                                        |                                        |
| NC/FC                                  | 0.71                                   |                                        |                                        | 0.00                                   |                                        | 0.18                                   |
| AC/FC                                  | 0.62                                   |                                        | -0.12                                  | 0.00                                   |                                        | 2.07                                   |
| CC/FC                                  |                                        |                                        |                                        | -0.30                                  | 0.00                                   |                                        |
| RC/FC                                  |                                        | 0.15                                   | -0.39                                  | 0.00                                   | -0.17                                  |                                        |
| WC/FC                                  |                                        |                                        |                                        | 0.53                                   |                                        | -0.13                                  |
| HC/FC                                  | 0.21                                   |                                        |                                        |                                        | 0.76                                   | -1.10                                  |
| AC/NC                                  |                                        |                                        |                                        |                                        |                                        | -2.45                                  |
| CC/NC                                  | -0.22                                  |                                        | 0.10                                   | 1.04                                   | -0.41                                  |                                        |
| RC/NC                                  |                                        |                                        |                                        | -1.02                                  |                                        |                                        |
| WC/NC                                  | -0.19                                  |                                        | 0.15                                   | -0.76                                  |                                        | 1.58                                   |
| HC/NC                                  |                                        | -0.02                                  |                                        |                                        | -1.59                                  | 0.87                                   |
| CC/AC                                  | -0.25                                  |                                        | 0.19                                   | 1.44                                   | -0.17                                  |                                        |
| RC/AC                                  |                                        |                                        |                                        |                                        | 2.25                                   | -0.19                                  |
| WC/AC                                  |                                        |                                        |                                        |                                        | 2.64                                   | -0.55                                  |
| HC/AC                                  | 1.03                                   |                                        | -0.02                                  | 0.33                                   | -1.95                                  |                                        |
| RC/CC                                  | -0.64                                  | 0.18                                   |                                        |                                        | 0.82                                   | -0.26                                  |
| WC/CC                                  | 1.23                                   |                                        | -0.83                                  | 1.12                                   | -1.80                                  |                                        |
| HC/CC                                  | -0.75                                  |                                        | 1.07                                   |                                        | -0.95                                  | 0.04                                   |
| WC/RC                                  | -0.70                                  |                                        | 0.03                                   | -1.01                                  | 0.33                                   |                                        |
| HC/RC                                  | -0.01                                  | 0.99                                   |                                        |                                        | 3.54                                   | -0.70                                  |
| HC/WC                                  |                                        |                                        | -0.76                                  | -1.03                                  | 0.51                                   |                                        |

$\hat{\beta}_{1,lasso}(\hat{\lambda}), \hat{\beta}_{2,lasso}(\hat{\lambda}), \hat{\beta}_{3,lasso}(\hat{\lambda})$  represent result of estimated coefficients via LASSO for each SC group, TE, SE, and SY,

respectively, where  $\hat{\lambda} = e^{\log(\hat{\lambda})}$ , chosen from the result of ten-fold cross validation.



**Table S5. Result of estimated coefficients for Questionnaire features for each SC type using LASSO**

| Features                               | Male                                   |                                        |                                        | Female                                 |                                        |                                        |
|----------------------------------------|----------------------------------------|----------------------------------------|----------------------------------------|----------------------------------------|----------------------------------------|----------------------------------------|
|                                        | $\hat{\beta}_{1,lasso}(\hat{\lambda})$ | $\hat{\beta}_{2,lasso}(\hat{\lambda})$ | $\hat{\beta}_{3,lasso}(\hat{\lambda})$ | $\hat{\beta}_{1,lasso}(\hat{\lambda})$ | $\hat{\beta}_{2,lasso}(\hat{\lambda})$ | $\hat{\beta}_{3,lasso}(\hat{\lambda})$ |
| $\hat{\beta}_{0,lasso}(\hat{\lambda})$ | 0.20                                   | -0.27                                  | 0.07                                   | 0.34                                   | -0.26                                  | -0.08                                  |
| Q_1_1                                  |                                        | -0.24                                  |                                        |                                        | -0.28                                  |                                        |
| Q_1_2                                  |                                        |                                        |                                        |                                        |                                        |                                        |
| Q_1_3                                  |                                        | 0.26                                   |                                        |                                        | 0.23                                   |                                        |
| Q_2_1                                  | -0.66                                  |                                        | 0.26                                   | -0.36                                  |                                        | 0.09                                   |
| Q_2_2                                  |                                        |                                        |                                        |                                        |                                        |                                        |
| Q_2_3                                  |                                        |                                        |                                        |                                        |                                        |                                        |
| Q_3_1                                  |                                        |                                        |                                        |                                        | -0.29                                  |                                        |
| Q_3_2                                  |                                        |                                        |                                        |                                        |                                        |                                        |
| Q_3_3                                  |                                        |                                        |                                        |                                        |                                        | -0.05                                  |
| Q_4_1                                  |                                        |                                        |                                        |                                        |                                        |                                        |
| Q_4_2                                  |                                        |                                        |                                        |                                        |                                        |                                        |
| Q_4_3                                  |                                        |                                        |                                        |                                        |                                        | -0.02                                  |
| Q_5_1                                  |                                        | -0.02                                  | 0.07                                   |                                        |                                        |                                        |
| Q_5_2                                  |                                        |                                        |                                        |                                        |                                        |                                        |
| Q_5_3                                  |                                        |                                        |                                        |                                        |                                        | -0.01                                  |
| Q_6_1                                  |                                        | -0.28                                  |                                        |                                        |                                        |                                        |
| Q_6_2                                  |                                        |                                        |                                        |                                        |                                        |                                        |
| Q_6_3                                  |                                        | 0.28                                   |                                        |                                        | 0.11                                   | -0.21                                  |
| Q_7_1                                  |                                        | -0.15                                  |                                        | -0.15                                  |                                        |                                        |
| Q_7_2                                  |                                        |                                        |                                        |                                        |                                        |                                        |
| Q_7_3                                  |                                        |                                        |                                        |                                        |                                        |                                        |
| Q_8_1                                  |                                        | -0.10                                  |                                        | 0.03                                   |                                        |                                        |
| Q_8_2                                  |                                        |                                        |                                        |                                        |                                        | 0.04                                   |
| Q_8_3                                  |                                        |                                        |                                        |                                        | 0.14                                   |                                        |
| Q_9_1                                  |                                        |                                        |                                        |                                        |                                        | 0.08                                   |
| Q_9_2                                  |                                        |                                        |                                        |                                        |                                        |                                        |
| Q_9_3                                  |                                        |                                        |                                        | 0.06                                   |                                        | -0.07                                  |
| Q_10_1                                 |                                        |                                        |                                        |                                        |                                        |                                        |
| Q_10_2                                 |                                        |                                        | -0.21                                  |                                        | -0.07                                  |                                        |
| Q_10_3                                 |                                        |                                        |                                        |                                        |                                        |                                        |
| Q_11_1                                 |                                        | -0.12                                  | 0.00                                   |                                        | -0.23                                  |                                        |
| Q_11_2                                 |                                        |                                        |                                        |                                        |                                        | 0.00                                   |
| Q_11_3                                 |                                        |                                        |                                        |                                        |                                        |                                        |
| Q_12_1                                 |                                        |                                        |                                        |                                        |                                        |                                        |
| Q_12_2                                 |                                        |                                        |                                        |                                        |                                        |                                        |

|        |       |       |       |       |       |
|--------|-------|-------|-------|-------|-------|
| Q_12_3 |       | 0.04  |       | 0.02  |       |
| Q_13_1 |       |       | 0.22  | -0.17 |       |
| Q_13_2 |       |       |       |       |       |
| Q_13_3 |       |       |       |       |       |
| Q_13_4 |       |       | 0.22  | -0.19 |       |
| Q_14_1 | 0.06  |       | 0.17  | -0.11 |       |
| Q_14_2 |       |       |       |       |       |
| Q_14_3 |       |       | -0.19 |       |       |
| Q_15_1 |       |       |       | -0.13 |       |
| Q_15_2 |       |       |       | 0.21  |       |
| Q_15_3 |       |       |       |       |       |
| Q_16_1 |       |       | 0.20  |       |       |
| Q_16_2 | 0.12  | -0.13 | 0.01  | -0.19 |       |
| Q_16_3 | -0.11 |       | -0.03 |       |       |
| Q_16_4 |       |       |       |       |       |
| Q_17_1 |       |       | -0.09 |       |       |
| Q_17_2 |       |       | 0.03  |       | -0.05 |
| Q_17_3 |       |       |       |       |       |
| Q_18_1 |       |       |       | -0.18 |       |
| Q_18_2 |       |       |       |       |       |
| Q_18_3 |       |       |       | 0.18  |       |
| Q_19_1 |       |       |       |       |       |
| Q_19_2 |       |       |       |       |       |
| Q_19_3 |       |       | -0.04 |       |       |
| Q_20_1 |       | -0.19 | 0.20  | -0.24 |       |
| Q_20_2 |       |       |       |       |       |
| Q_20_3 | -0.22 | 0.21  |       |       |       |
| Q_20_4 |       |       | -0.07 |       | 0.09  |
| Q_21_1 |       | -0.01 |       |       |       |
| Q_21_2 |       |       | 0.02  |       |       |
| Q_21_3 |       |       |       | 0.43  |       |
| Q_21_4 |       |       |       |       |       |
| Q_22_1 |       | -0.09 | 0.08  | -0.23 |       |
| Q_22_2 | -0.18 |       |       | 0.31  |       |
| Q_22_3 |       |       | -0.20 |       |       |
| Q_23_1 |       |       |       |       |       |
| Q_23_2 |       |       |       |       |       |
| Q_23_3 |       |       |       |       |       |
| Q_23_4 |       |       |       | -0.31 |       |
| Q_24_1 |       |       |       | 0.05  |       |
| Q_24_2 |       |       | 0.01  |       |       |

|        |       |       |       |       |       |
|--------|-------|-------|-------|-------|-------|
| Q_24_3 |       |       |       |       |       |
| Q_24_4 |       |       | -0.25 |       | 0.05  |
| Q_24_5 |       |       |       |       |       |
| Q_25_1 |       |       |       | -0.03 |       |
| Q_25_2 |       |       | 0.06  |       |       |
| Q_25_3 |       |       |       |       | -0.19 |
| Q_25_4 |       |       |       |       | 0.02  |
| Q_25_5 |       |       |       |       | -0.30 |
| Q_25_6 |       |       |       |       |       |
| Q_25_7 |       |       |       |       |       |
| Q_26_1 |       |       | -0.04 | 0.03  |       |
| Q_26_2 | -0.01 | 0.00  |       |       |       |
| Q_27_1 | -0.11 | 0.17  |       |       |       |
| Q_27_2 | 0.21  | -0.23 | 0.06  |       |       |
| Q_27_3 |       |       |       |       |       |
| Q_27_4 |       |       |       |       |       |
| Q_28_1 | 0.26  | -0.07 | 0.16  |       |       |
| Q_28_2 |       |       |       |       |       |
| Q_28_3 | -0.03 | 0.06  | -0.53 |       | 0.03  |
| Q_28_4 |       |       |       | 0.50  |       |
| Q_29_1 |       |       |       |       |       |
| Q_29_2 |       |       |       |       |       |
| Q_29_3 | -0.02 |       | 0.03  |       |       |
| Q_29_4 |       |       |       |       |       |
| Q_30_1 |       |       |       |       |       |
| Q_30_2 | -0.04 |       |       |       |       |
| Q_30_3 |       |       |       |       | -0.13 |
| Q_30_4 |       |       |       |       |       |
| Q_31_1 |       |       | 0.20  | -0.15 |       |
| Q_31_2 |       |       |       |       |       |
| Q_31_3 |       |       |       |       |       |
| Q_31_4 |       |       |       |       | 0.16  |
| Q_32_1 |       | 0.13  | -0.05 | 0.37  |       |
| Q_32_2 |       |       |       |       |       |
| Q_32_3 |       |       |       | -0.15 |       |
| Q_33_1 |       |       |       | -0.39 |       |
| Q_33_2 |       |       |       |       |       |
| Q_33_3 | -0.04 |       |       | 0.01  |       |
| Q_33_4 |       |       | -0.03 | 0.15  |       |
| Q_33_5 |       |       |       |       |       |
| Q_33_6 |       |       |       |       |       |

|         |      |       |       |       |       |
|---------|------|-------|-------|-------|-------|
| Q_33_7  |      |       | 0.10  | -0.03 |       |
| Q_33_8  |      |       | -0.03 |       | 0.03  |
| Q_33_9  | 0.00 |       | 0.05  |       |       |
| Q_33_10 |      |       |       | -0.01 |       |
| Q_33_11 |      |       |       |       |       |
| Q_34_1  |      |       | 0.04  |       |       |
| Q_34_2  |      | 0.90  |       | 0.22  |       |
| Q_34_3  |      |       | 0.00  | -0.19 |       |
| Q_34_4  |      |       |       |       |       |
| Q_34_5  |      |       |       |       |       |
| Q_35_1  |      |       | -0.24 | 0.04  | -0.27 |
| Q_35_2  |      |       |       |       |       |
| Q_35_3  |      |       |       | -0.21 |       |
| Q_35_4  |      | -0.14 |       |       | 0.10  |
| Q_35_5  |      |       |       |       | 0.12  |
| Q_35_6  |      |       |       |       |       |
| Q_35_7  |      | -0.14 | 0.47  |       |       |
| Q_35_8  |      |       |       |       |       |
| Q_35_9  |      |       | -0.16 |       |       |
| Q_35_10 |      |       |       |       |       |
| Q_35_11 |      |       |       |       |       |
| Q_35_12 |      |       |       |       | -0.25 |

---

$\hat{\beta}_{1,lasso}(\hat{\lambda}), \hat{\beta}_{2,lasso}(\hat{\lambda}), \hat{\beta}_{3,lasso}(\hat{\lambda})$  represent result of estimated coefficients via LASSO for each SC group, TE, SE, and SY,

respectively, where  $\hat{\lambda} = e^{\log(\hat{\lambda})}$ , chosen from the result of ten-fold cross validation.

**Table S6. Result of estimated coefficients for Questionnaire continuous features for each SC type using OLS**

| SC type | Features  | Male    |       |       | Female  |       |       |
|---------|-----------|---------|-------|-------|---------|-------|-------|
|         |           | $\beta$ | S.E   | p     | $\beta$ | S.E   | p     |
| TE      | Intercept | 0.098   | 0.590 | 0.999 | -0.350  | 0.429 | 0.414 |
|         | AGE       | 0.002   | 0.012 | 0.884 | 0.009   | 0.009 | 0.282 |
|         | $Q_{TE}$  | 0.648   | 0.228 | 0.005 | 0.785   | 0.146 | 0.000 |
|         | $Q_{SE}$  | -0.183  | 0.193 | 0.343 | -0.084  | 0.142 | 0.556 |
|         | $Q_{SY}$  | -0.453  | 0.210 | 0.031 | -0.513  | 0.149 | 0.001 |
| SE      | Intercept | -0.600  | 0.625 | 0.337 | -0.420  | 0.432 | 0.330 |
|         | AGE       | -0.003  | 0.012 | 0.806 | 0.001   | 0.009 | 0.881 |
|         | $Q_{TE}$  | -0.146  | 0.227 | 0.519 | -0.004  | 0.149 | 0.979 |
|         | $Q_{SE}$  | 0.933   | 0.199 | 0.000 | 0.913   | 0.149 | 0.000 |
|         | $Q_{SY}$  | -0.501  | 0.220 | 0.023 | -0.418  | 0.146 | 0.004 |

Reference category : SY S.E : standard error of  $\beta$

**Table S7. Result of estimated coefficients for estimated probability of individual diagnostic model for each SC type using LASSO**

| Features                               | Male                                   |                                        |                                        | Female                                 |                                        |                                        |
|----------------------------------------|----------------------------------------|----------------------------------------|----------------------------------------|----------------------------------------|----------------------------------------|----------------------------------------|
|                                        | $\hat{\beta}_{1,lasso}(\hat{\lambda})$ | $\hat{\beta}_{2,lasso}(\hat{\lambda})$ | $\hat{\beta}_{3,lasso}(\hat{\lambda})$ | $\hat{\beta}_{1,lasso}(\hat{\lambda})$ | $\hat{\beta}_{2,lasso}(\hat{\lambda})$ | $\hat{\beta}_{3,lasso}(\hat{\lambda})$ |
| $\hat{\beta}_{0,lasso}(\hat{\lambda})$ | 0.38                                   | 0.08                                   | -0.46                                  | 0.30                                   | -0.39                                  | 0.09                                   |
| $(\pi_{i1})_1$                         | 0.98                                   |                                        |                                        | 1.13                                   |                                        |                                        |
| $(\pi_{i2})_1$                         | -0.03                                  | 2.42                                   |                                        |                                        | 1.13                                   |                                        |
| $(\pi_{i3})_1$                         |                                        | -0.09                                  | 2.91                                   |                                        |                                        | 1.55                                   |
| $(\pi_{i1})_2$                         | 3.04                                   |                                        | -0.07                                  | 2.27                                   |                                        |                                        |
| $(\pi_{i2})_2$                         | -0.61                                  | 0.87                                   |                                        | -0.47                                  | 2.21                                   |                                        |
| $(\pi_{i3})_2$                         |                                        | -1.32                                  | 0.44                                   |                                        |                                        |                                        |
| $(\pi_{i1})_3$                         | 1.17                                   | -0.20                                  |                                        | 1.09                                   |                                        |                                        |
| $(\pi_{i2})_3$                         |                                        | 3.09                                   | -0.40                                  |                                        | 1.75                                   |                                        |
| $(\pi_{i3})_3$                         | -1.42                                  |                                        | 1.16                                   |                                        |                                        | 2.02                                   |
| $(\pi_{i1})_4$                         |                                        |                                        | -0.65                                  | 0.92                                   |                                        |                                        |
| $(\pi_{i2})_4$                         |                                        |                                        |                                        |                                        | 2.06                                   |                                        |
| $(\pi_{i3})_4$                         |                                        | -0.44                                  | 2.40                                   |                                        |                                        | 2.36                                   |

$\hat{\beta}_{1,lasso}(\hat{\lambda}), \hat{\beta}_{2,lasso}(\hat{\lambda}), \hat{\beta}_{3,lasso}(\hat{\lambda})$  represent result of estimated coefficients via LASSO for each SC group, TE, SE, and SY,

respectively, where  $\hat{\lambda} = e^{\log(\hat{\lambda})}$ , chosen from the result of ten-fold cross validation.

**Figure S1. The procedure of generating continuous variables with the response categories of the questions in the questionnaire.**

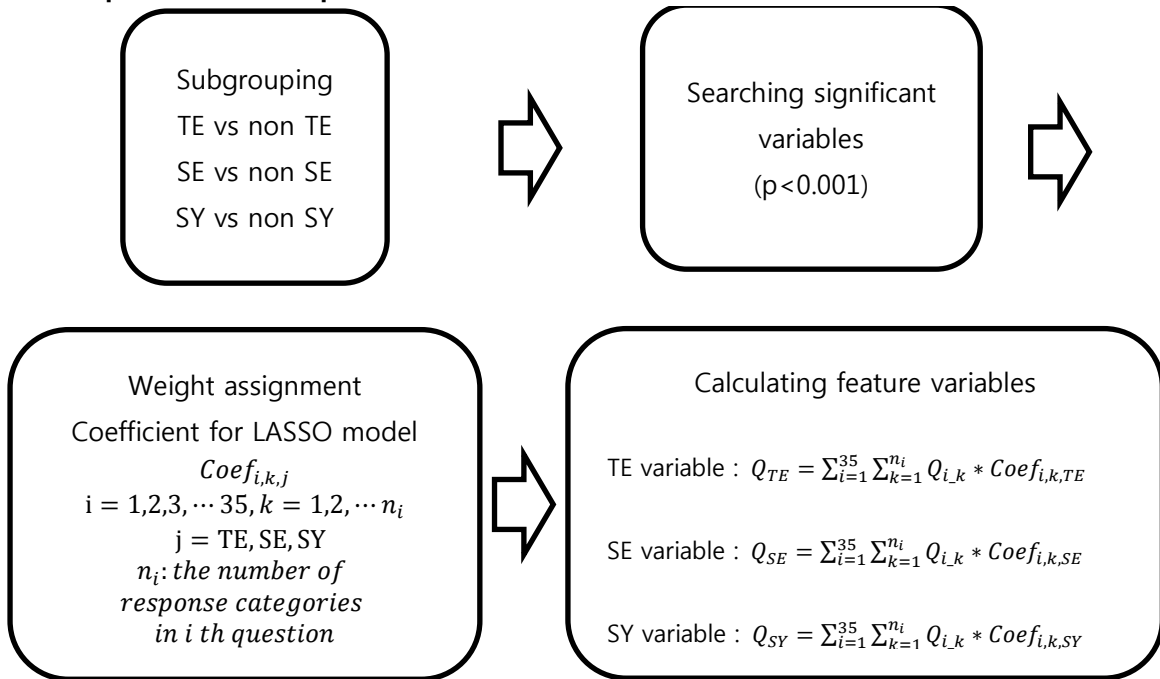

Supplement: f1 [file 9180159.f1.pdf]
